## Heritable changes in division speed accompany the diversification of single T cell fate

Marten Plambeck<sup>a,1</sup>, Atefeh Kazeroonian<sup>a,1</sup>, Dirk Löffler<sup>b</sup>, Timm Schroeder<sup>b</sup>, Dirk H. Busch<sup>a,\*</sup>, Michael Flossdorf<sup>a,\*</sup>, Veit R. Buchholz<sup>a,\*</sup>

<sup>a</sup> Institute for Medical Microbiology, Immunology and Hygiene, Technical University of Munich (TUM), Munich 81675, Germany

<sup>b</sup> Department of Biosystems, Science and Engineering, Eidgenössische Technische Hochschule Zürich (ETH Zurich), 4058 Basel, Switzerland

<sup>1</sup> These authors contributed equally.

\* Corresponding author

### Abstract (250 words max.):

Rapid clonal expansion of antigen specific T cells is a fundamental feature of adaptive immune responses. It enables the outgrowth of an individual T cell into thousands of clonal descendants that diversify into short-lived effectors and long-lived memory cells. Clonal expansion is thought to be programmed upon priming of a single naïve T cell and then executed by homogeneously fast divisions of all of its descendants. However, the actual speed of cell divisions in such an emerging ‘T cell family’ has never been measured with single-cell resolution. Here, we utilize continuous live-cell imaging *in vitro* to track the division speed and genealogical connections of all descendants derived from a single naïve CD8<sup>+</sup> T cell throughout up to ten divisions of activation-induced proliferation. This comprehensive mapping of T cell family trees identifies a short burst phase, in which division speed is homogeneously fast and maintained independent of external cytokine availability or continued T cell receptor stimulation. Thereafter, however, division speed diversifies and model-based computational analysis using a novel Bayesian inference framework for tree-structured data reveals a segregation into heritably fast and slow dividing branches. This diversification of division speed is preceded already during the burst phase by variable expression of the interleukin-2 receptor alpha chain. Later it is accompanied by selective re-expression of memory marker CD62L in slower dividing branches. Taken together, these data demonstrate that T cell clonal expansion is structured into subsequent burst and diversification phases the latter of which coincides with specification of memory vs. effector fate.

### Significance (120 words max.):

Rapid clonal expansion of antigen-specific T cells is a fundamental feature of adaptive immune responses. Here, we utilize continuous live-cell imaging *in vitro* to track the division speed and genealogical connections of all descendants derived from a single naïve CD8<sup>+</sup> T cell throughout up to ten divisions of activation-induced proliferation. Bayesian inference of tree-structured data reveals that clonal expansion is divided into a homogeneously fast burst phase encompassing two to three divisions and a subsequent diversification phase during which T cells segregate into quickly dividing effector T cells and more slowly cycling memory precursors. Our work highlights cell cycle speed as a major heritable property that is regulated in parallel to key lineage decisions of activated T cells.

### Introduction:

The smallest unit from which an adaptive immune response can originate is an individual antigen-specific lymphocyte (1). For both CD4<sup>+</sup> and CD8<sup>+</sup> T cells, it has been shown that single-cell-derived immune responses *in vivo* are subject to immense variation, despite being directed against the same epitope and unfolding within the same host (2-6). Upon vaccination or infection even naïve T cells harboring identical T cell receptors (TCRs) will generate ‘T cell families’ (i.e. immune responses derived from a single T cell) of highly distinct size and phenotypic composition (2, 3, 6). Interestingly, within a given T cell family, clonal expansion and T cell differentiation are interdependent: At the peak of expansion, larger T cell families harbor lower percentages of long-lived central memory precursors (CMPs) and higher percentages of shorter-lived effector memory precursors (EMPs) and terminal effectors (TEs) than smaller T cell families (2, 7).

To account for the variation in single-cell-derived expansion and the interdependency of T cell phenotype and family size, we have put forward a stochastic developmental framework in which naïve

T cells first give rise to slowly dividing CMPs, which can then differentiate into more quickly dividing but shorter-lived progeny (2). This framework proved to be efficient in describing features of single-cell-derived T cell responses *in vivo*, such as the relative independence of a T cell family's memory capacity from its acute size of clonal expansion. This framework is further supported by direct measurements of division speed *in vivo*, showing that, already by day four after vaccination, CD62L<sup>+</sup> CMPs undergo on average one division less per day than their CD62L<sup>-</sup> counterparts (8). Moreover, recent work confirmed the largely unidirectional differentiation of CMPs into non-CMPs during the expansion phase of a T cell response (9) and the role of CMPs as the major source of long-lasting CD8<sup>+</sup> T cell memory (10-12).

However, certain features of our originally proposed stochastic framework are at odds with observations made during the very early phase of T cell activation: First, directly after activation *in vivo*, CD8<sup>+</sup> T cells have been found to divide particularly fast (13, 14), conflicting with the idea of an initial emergence of slowly-dividing CMPs. Second, elegant *in vitro* experiments have shown that division activity is strongly correlated among the members of a given T or B cell family, arguing against the emergence of distinct expansion kinetics within the same family (15-18). However, these latter studies mainly investigated the first three to four cell divisions executed by an expanding lymphocyte family and compared division speed only between close relatives within the family tree (i.e., sibling or mother-daughter correlations). We reasoned that to investigate the gradual cross-generational emergence of slower- or faster-dividing genealogical branches, division speed and T cell kinship must be tracked across longer genealogical distances than done before.

Therefore, we performed continuous *in vitro* imaging of single-cell-derived clonal expansion for up to five days after T cell activation. In contrast to previous studies, we utilized a culture system that allowed us to faithfully track the genealogical connections within expanding T cell families for up to ten generations. We found that after completing their first cell cycle, CD8<sup>+</sup> T cells underwent a burst phase of two to three uniformly quick divisions. Mean division speed then slowed down in absence of continued TCR stimulation, and remained high when TCR stimulation was maintained. However, even upon continuous TCR stimulation, distinctly proliferating branches emerged in the later generations of a family tree. To better quantify the hereditary nature of this process, we developed a computational framework that enabled a model-based analysis of the tree-structured data obtained from live-cell imaging. We combined branching process modeling with a Bayesian inference approach for models with hidden states. This framework enabled us to test various hypotheses about the diversification pattern of proliferating T cells into subsets with distinct inter-division times. These analyses identified a model in which naïve T cells first differentiate into a quickly proliferating early-activated state, which then transits into slowly and quickly dividing branches that heritably maintain their distinct division activity. Further investigating the molecular regulation of these processes, we found that distinct expression levels of the high affinity interleukin-2 receptor alpha chain (CD25), established during the burst phase, preceded the adoption of distinct division activities. Moreover, we found that CD62L, as a marker of CMP differentiation, was preferentially re-expressed in slowly dividing T cells that emerged beyond the burst phase.

Taken together, our work shows that after a short burst phase the division speed of activated CD8<sup>+</sup> T cells segregates into slow and fast cycling branches. Moreover, it provides novel mathematical methodology suited to test models of heredity within tree-structure data, generated by an expanding T cell family or any other proliferating and continuously-imaged cell type.

## Results:

**Continuous *in vitro* imaging reveals that distinct division speeds emerge within the same T cell family.** In order to comprehensively map clonal expansion *in vitro* starting out from individual naïve CD8<sup>+</sup> T cells, we utilized a continuous imaging platform (19). Naïve CD44<sup>low</sup> CD8<sup>+</sup> T cells were individually sorted via flow cytometry from peripheral blood of C57BL/6 mice, transferred to culture wells coated with anti-CD3 and anti-CD28 antibodies and supplemented with interleukin 2 (IL-2) (**Fig. 1 A**). This treatment enabled TCR restimulation throughout the expansion phase and induced vigorous proliferation that we monitored via continuous imaging for up to five days (**Fig. 1 B and Movie S1**). Importantly, IL-2 concentrations remained at saturating levels throughout the whole observation period (**Fig. S1**). Since overcrowding of microwells (20–100 µm in diameter) and clustering of T cells can be a problem for tracking the individual members of an expanding T cell family tree (16, 17), we sorted

single T cells into relatively large wells with a diameter of 1840  $\mu\text{m}$  and imaged the complete well (**Movie S2**). These “macrowells” allowed for freer migration and reduced overlay phenomena of activated T cells. This enabled a more seamless tracing of individual T cells throughout many generations of division activity (**Fig. 1C–D and Movie S3**). We found that activated T cells required on average 39 hours to complete their first cell division (**Fig. 1 E**). The average interdivision time for subsequent cell cycles amounted to 8.6 hours but showed strong variation ranging from 5 to 28 hours per cell cycle (**Fig. 1 F**). Interestingly, while some of this variation could be attributed to differences between the overall division speed of distinct T cell families (interfamily variance), most of it was derived from differences in division speed between individual T cells belonging to the same family (intrafamily variance) (**Fig. 1G**). To explore whether these differences arose as random fluctuations or were heritably maintained, we first investigated correlations of division speed between close relatives in a family tree. As previously reported (14-17), we found that T cell siblings shared similar division speeds with one another and with the mother cell from which they were derived (**Fig. 1 D and H**). To then investigate more distant genealogical relationships, we grouped the progeny of an individual T cell into four main branches, emerging from the second generation of each family tree (**Fig. 1 I**). In more than 40% of family trees (18 of 43), the average T cell division speed differed significantly between these branches (**Fig. 1 J**). We also identified distinct average division speeds in branches derived from the first generation of T cell family trees, albeit at a lower incidence (**Fig. S2**). These data suggest that slow and fast cell cycle activities can evolve within the same T cell family and can be heritably maintained across multiple generations.

**Computational analysis of T cell family trees identifies a model in which early activated T cells diverge into slow and fast cycling subsets.** To more formally explore, whether differentiation of proliferating T cells into subsets with heritably distinct division speeds indeed accounted for the variability of inter-division times and the resulting interior structure of T cell family trees, we used a branching process framework (20). Since we did not observe the assumed underlying differentiation processes directly, we modeled the state/subset of each cell as a hidden variable. To infer the parameters of the branching process, we then developed a Bayesian inference framework for tree-structured data, comprised of a Markov Chain Monte Carlo (MCMC) sampling approach with hidden layers (21, 22). Our inference framework takes as input the genealogical trees obtained from live cell imaging movies, as well as a model hypothesis describing the underlying branching process. As output, it returns the posterior distribution of model parameters as well as the model evidence for every assumed model hypothesis. These model evidences and corresponding Bayes factors are then used for model selection (**Fig 2A and Supplementary Methods**). The individual steps of our iterative scheme are depicted in **Figure 2B (Fig. 2B and Supplementary Methods)**.

We assumed that the inter-division times of cells belonging to every subset are distributed according to a log-normal distribution with a specific mean and coefficient of variation (CV). To allow for efficient computation we divided our dataset into eight groups of five family trees each, and for each group, inferred the posterior distribution of model parameters as well as the model evidences. We then selected the models best fitting to our data by calculating Bayes factors based on the model evidences. To further assess how well the best-fitting model represented our data, we tested whether model-based simulations recapitulated the statistical characteristics of the experimental data (**Supplementary Methods**).

We first investigated three basic model topologies: In model #1 naïve T cells gave rise to one proliferating subset, in model #2 to one proliferating subset that could differentiate into another subset proliferating at a distinct speed, and in model #3 to one proliferating subset that could differentiate into two others each proliferating at distinct speeds (**Fig. 2 C**). As expected, a model assuming that proliferation of all activated T cells could be described by one division speed (i.e., one distribution of division speed learned from the data) was insufficient account for the specific structure of T cell family trees (**Fig. 2 D and S3-6**). Interestingly, differentiation of one proliferating subset into another was also insufficient to account for the measured data. This instead required the early emergence of a quickly proliferating subset with the capacity to differentiate into slowly or quickly cycling progeny (**Fig. 2 D and S3-6**). Mean inter-division times of these subsets were predicted at 8.8 h, 7.8 h and 12 h for the early activated (EA), fast-dividing (F) and slow-dividing (S) subsets, respectively (**Fig. 2 E and S7**). The learned distribution of division speed for the slow-dividing subset was relatively wide, while those of the early-activated and fast-dividing subsets showed considerably less variation (**Fig. 2 F and S7**). To rule out the possibility that model #3 was the preferred model only due to its additional flexibility,

we compared it to a mixture model in which, once leaving the EA state, cell cycle speeds are taken from two overlaid distributions without considering the topological restraints of the proposed differentiation process (**Supplementary Methods**). This mixture model, however, did not account for the experimentally determined structure of T cell family trees (**Fig. S3-6**). Using the simulation analysis mentioned earlier, we found that the best-fit “EA to S or F” model—although correctly reproducing the overall distribution of inter-division times (**Fig. 2 G and S8**)—underestimated the contribution of interfamily differences to the overall variation of T cell division speed (**Fig. 2 H and S9**). It further overestimated the percentage of trees with branches showing significantly distinct division speeds (**Fig. 2 I and S10**). This indicated that division speed of activated T cells may not only depend on their current differentiation state (EA, S or F) but also on an ancestral imprinting received by the starting cell and passed down to its descendants. To account for this clonal imprinting of division speed, we allowed for a log-normally distributed factor in the model formalism that could modify all subset-specific proliferation rates of a given T cell family by a certain value (**Supplementary Methods**). Fitting this extended model (model #4, **Fig. 2 J**) to the data, we quantified the variation of subset-specific mean inter-division times between different families (**Fig. 2 K and S11**) and found that this model was able to explain the data best (**Fig. 2 L and S3-5 and S12**). Importantly, despite the additional variation introduced by this factor, model #4 maintained the distinct division speeds of the EA, F and S subsets (**Fig. 2 M and N and S13**). We noted that the overall distribution of inter-division times in simulated data based on model #4 (**Fig. 2 O and S14**) was similar to the results of model #3 (**Fig. 2 G and S8**), and this statistical feature alone would not have been enough to distinguish between the two models. Instead, more elaborate structural features of the T cell family trees could demonstrate differences between the two models. Indeed, model #4 now correctly captured both intra- and inter-family variability (**Fig. 2 P, S15**) and generated a realistic fraction of T cell family trees whose second-generation branches proliferated at distinct average speeds (**Fig. 2 Q, S16**). The inferred model parameters and model evidences for all models and data-groups are depicted in **Supplementary Figures S7, S13 and S17-S19**. Taken together, these computational analyses suggested that T cell clonal expansion is not a homogenous process programmed exclusively upon T cell priming. Instead, the emergence of multiple T cell subsets proliferating at distinct speeds appeared necessary to correctly capture the evolution of an expanding T cell family tree.

**Diversification of division speed occurs after a homogenous burst phase and is preceded by differences in CD25 expression.** The experimental conditions, under which the above-mentioned results were gathered, allowed both the starting cell as well as its descendants to receive TCR stimulation. This raised the question whether the emergence of slow and fast dividing branches within the same T cell family tree was the consequence of TCR stimuli incidentally accumulating in one branch but not the other. Thus, we next asked whether distinct division speeds would also emerge when TCR stimuli are restricted to the starting cell. To achieve this, we activated T cells in bulk via plate bound anti-CD3 and anti-CD28 antibodies in presence of IL-2 and IL-12 and, 24 h later, sorted single undivided T cells into wells containing no further TCR stimuli. To sustain proliferation for an extended period of time, wells were supplemented with saturating doses of IL-2 only (“brief”) or IL-2 and IL-12 (“brief + IL-12”). As before we tracked T cell proliferation via continuous imaging for up to five days (**Fig. 3 A**). Upon brief TCR stimulation, 1<sup>st</sup> and 2<sup>nd</sup> generation T cells divided at the same average speed as those cultured in the sustained presence of TCR stimuli (“sustained”). After this initial burst phase, the average division speed of briefly stimulated T cells significantly slowed down, albeit less in the group supplemented with IL-2 and IL-12 (**Fig. 3 B and C**). Importantly, the variation in division speed of both the “brief” and “brief+IL-12” groups matched or even exceeded that of T cells receiving sustained TCR stimuli (**Fig. 3B and C**). If this variation arose due to random fluctuations in division speed, one would expect that over time short and long inter-division times cancel each other out and all members of a growing T cell family occupy the same or adjacent generations. However, we found that upon acquiring an increasing number of divisions, the generational range between the most and least divided members of a T cell family constantly widened, arguing in favor of distinct family branches heritably maintaining slower and faster cell cycle activity (**Fig. 3 D**). To more closely investigate the mechanistic origin of these distinct division speeds, we measured the expression of the high-affinity IL-2 receptor alpha chain (CD25) during continuous imaging. We achieved this by addition of very low concentrations of anti-CD25 antibody conjugated to relatively photostable fluorophores such as Phycoerythrin (PE) or Allophycocyanin (APC) (23). We found that addition of sufficiently low antibody concentrations

interfered only very little with the proliferative activity of activated T cells (**Fig. S20**) but still generated readily detectable fluorescent signals (**Movie S4**). Interestingly, T cells receiving brief vs. sustained TCR stimulation showed distinct levels of CD25 surface expression already within the 1<sup>st</sup> and 2<sup>nd</sup> generation but still proliferated at the same speed. Only from the 4<sup>th</sup> generation onwards did lower or higher CD25 expression levels begin to correlate with lower or higher T cell division speed (**Fig. 3 E**). In fact, closer inspection of individual T cell family trees showed that changes in CD25 expression levels can be allocated to specific branches and can precede changes in division speed that develop across multiple generations (**Fig. 3 F and Fig. S21**). Taken together, these data indicate that during the first two generations of T cell proliferation, division speed is largely independent of sustained TCR stimuli, IL-12 availability or CD25 expression levels. Thereafter, however, distinct levels of CD25 surface expression begin to correlate with distinct division speeds and are heritably maintained within distinct branches of an expanding family tree.

**Adoption of slower division speed coincides with re-expression of CMP marker CD62L.** Finally, we aimed to investigate whether these linked changes in IL-2 receptivity and division speed also correlated with memory vs. effector T cell differentiation. Since CD62L<sup>+</sup> CMPs have been identified as early as day four post immunization *in vivo* and have been shown to divide slower than their CD62L<sup>-</sup> counterparts (8), we decided to investigate expression of this memory marker in our experimental system. First, we analyzed single-cell-derived T cell responses via flow cytometry at day five after *in vitro* activation. In line with previous observations made *in vivo*, we found that larger T cell families contained lower percentages of CD62L<sup>+</sup> T cells (**Fig. 4 A**). Moreover, when tracking T cell responses derived from populations of 100 T cells via intracellular dye dilution, we found that those T cells which had undertaken more divisions contained lower percentages of CD62L<sup>+</sup> cells compared to their less-divided counterparts (**Fig. 4 B and C**). When tracking single-cell-derived T cell responses in the same manner, we found that T cell families stretched out across multiple generations and that CD62L<sup>-</sup> cells accumulated in the stronger divided offspring of the same starting cell (**Fig. 4 D and E**). While this observation could indicate that CD62L<sup>-</sup> T cells divide faster, it could also mean that differentiation into CD62L<sup>-</sup> T cells happens only after a certain generation is reached. To resolve this question, we again turned to continuous imaging. Immediately after T cell activation CD62L is enzymatically removed from the surface of activated T cells (24). In line with this shedding of CD62L, we found virtually no surface expression of this molecule immediately after T cell activation. However, CD62L surface expression reappeared from the 2<sup>nd</sup> generation onwards and coincided with a slower division speed relative to CD62L<sup>-</sup> T cells found in the same generation (**Fig. 4 F**). Importantly, division speed of CD62L<sup>+</sup> T cells remained relatively fixed throughout generations, arguing that the gradual slow-down of T cell families that we had observed from generations 3 to 6 resulted from an increasing number of T cells switching into the CD62L<sup>+</sup> state. The same differentiation associated reduction of cell cycle speed occurred in presence of IL-12, albeit with CD62L<sup>+</sup> T cells maintaining substantially faster division activity than in absence of this inflammatory cytokine (**Fig. 4 G**).

## Discussion

It is a hallmark of adaptive immunology that single antigen-specific T cells can generate progeny that diversifies into both terminally differentiated effector cells and precursors of long-lived memory cells (25). This fate diversification occurs in parallel to rapid T cell proliferation and computational modelling of single-cell-derived T cell responses has suggested that memory precursors and short-lived effector T cells are set apart by fundamentally distinct cell cycle speeds (2). Recently, we have shown that four days after initial T cell priming, memory precursors are characterized by a slower division speed than their effector counterparts *in vivo* (8). Early clonal expansion on the other hand was found *in vitro* to occur in a highly synchronized manner (15-18). Here, we set out to close the gap between these early *in vitro* observations and the later diversification of division speed and T cell fate observed *in vivo*. Therefore, we utilized continuous live-cell imaging and tracked the division speed, differentiation status and genealogical connections of all descendants derived from a single naïve T cell for up to ten divisions of activation-induced proliferation *in vitro*. We find that initial T cell proliferation indeed occurs in a burst-like manner. With rapid execution of T cell divisions being largely independent of further TCR and cytokine stimuli received beyond priming. At two to three cell divisions, the average duration of this burst is similar to that previously described for *in vitro* settings in which stimuli were stringently

restricted to the starting cell (18, 26, 27). Upon restriction of subsequent stimuli, including blockade of endogenous IL-2, T cell proliferation abruptly subsides after completion of this burst (18, 26, 27). This homogenous programming of proliferation activity, termed “division destiny”, has been attributed to a division counter (18, 26) or division timer (27) set in the starting cell and transmitted to all of its progeny. Here, we deliberately chose culture conditions that maintained T cell proliferation beyond the initial burst phase and closely monitored the evolution of cell cycle speed within the resulting family trees. Interestingly, we found evidence for a heredity of cell cycle speed that was in part programmed in the starting cell but also critically required the emergence of distinct T cell subsets proliferating at distinct speeds. One of these, the EA subset, was of transient nature and its life-time coincided with the duration of the initial proliferative burst. Thereafter, slow (S) and fast (F) cycling subsets emerged that were characterized by distinct CD25 and CD62L expression levels, two markers that have been found to characterize the early subdivision of long-lived CMPs (CD62L<sup>+</sup>CD25<sup>-</sup>) and non-CMPs (CD62L<sup>-</sup>CD25<sup>+</sup>) *in vivo* (28, 29). In keeping with a concept of asymmetric cell division (30), the segregation of these subsets has been proposed to occur as early as the first cell division. While our data cannot exclude such an immediate segregation, they rather support a developmental model in which lineage segregation begins somewhat later, after a burst-like expansion of two to three cells division. Thereafter, we find that individual branches within an expanding T cell family tree can maintain slower or faster cell cycle speeds that coincide with differences in expression of CD25 and CD62L. With these findings, our study puts renewed focus on the intertwined nature of cell cycle activity and T cell differentiation (31, 32). While previously this relation has been mainly explored with respect to the accumulated number of divisions, we now highlight the actual speed of cell division as a major heritable property that appears to be regulated in parallel to key lineage decisions of activated T cells. From a technical point of view, we provide a novel computational inference framework for analyzing tree-structured data obtained by live-cell imaging. Due to the complexity of such tree-structured data, previous studies have often only utilized summary statistics from live-cell imaging experiments to infer underlying kinetics (15, 33, 34). Our framework, however, exploits full structural information from this data type. As opposed to few other model-based analyses of lineage trees where phenotypic measurements were assumed to inform about cell state changes (35-38), our framework does not rely on phenotypic observations and links division speed to underlying hidden states. Another important feature of our study is the simultaneous analysis of complete genealogical trees without partitioning into smaller “sub-trees”, which ensures that no long-ranged structural information is lost. Our inference framework allows to investigate the complex kinetic structure of expanding T cell family trees and enables hypothesis testing as to the hereditary nature of cell cycle activity and the topological organization of T cell differentiation. It will be exciting to investigate whether the developmental framework proposed here will hold true *in vivo* and to more closely examine how T cell differentiation and cell cycle speed are connected on the molecular level.

## References:

1. Burnet SFM (1959) *The Clonal Selection Theory of Acquired Immunity* (Cambridge University Press).
2. Buchholz VR, et al. (2013) Disparate individual fates compose robust CD8<sup>+</sup> T cell immunity. *Cell* 153(4):630–635.
3. Gerlach C, et al. (2013) Heterogeneous differentiation patterns of individual CD8<sup>+</sup> T cells. *Cell* 153(4):635–639.
4. Tubo NJ, et al. (2013) Single naive CD4<sup>+</sup> T cells from a diverse repertoire produce different effector cell types during infection. *Cell* 153(4):785–796.
5. Plumlee CR, Sheridan BS, Cicek BB, Lefrançois L (2013) Environmental cues dictate the fate of individual CD8<sup>+</sup> T cells responding to infection. *Immunity* 39(2):347–356.
6. Cho Y-L, et al. (2017) TCR Signal Quality Modulates Fate Decisions of Single CD4(+) T Cells in a Probabilistic Manner. *Cell Rep* 20(4):806–818.

7. Graef P, et al. (2014) Serial transfer of single-cell-derived immunocompetence reveals stemness of CD8(+) central memory T cells. *Immunity* 41(1):116–126.
8. Kretschmer L, et al. (2020) Differential expansion of T central memory precursor and effector subsets is regulated by division speed. *Nat Commun* 11(1):113.
9. Lin W-HW, et al. (2016) CD8(+) T Lymphocyte Self-Renewal during Effector Cell Determination. *Cell Rep* 17(7):1773–1782.
10. Grassmann S, et al. (2020) Early emergence of T central memory precursors programs clonal dominance during chronic viral infection. *Nat Immunol* 170:2022.
11. Pais Ferreira D, et al. (2020) Central memory CD8+ T cells derive from stem-like Tcf7hi effector cells in the absence of cytotoxic differentiation. *Immunity*. doi:10.1016/j.immuni.2020.09.005.
12. Johnnidis JB, et al. (2021) Inhibitory signaling sustains a distinct early memory CD8+ T cell precursor that is resistant to DNA damage. *Science Immunology* 6(55):eabe3702.
13. Yoon H, Kim TS, Braciale TJ (2010) The cell cycle time of CD8+ T cells responding in vivo is controlled by the type of antigenic stimulus. *PLoS ONE* 5(11):e15423.
14. Kinjyo I, et al. (2015) Real-time tracking of cell cycle progression during CD8(+) effector and memory T-cell differentiation. *Nat Commun* 6:6301.
15. Hawkins ED, Markham JF, McGuinness LP, Hodgkin PD (2009) A single-cell pedigree analysis of alternative stochastic lymphocyte fates. *Proceedings of the National Academy of Sciences* 106(32):13457–13462.
16. Zaretsky I, et al. (2012) Monitoring the dynamics of primary T cell activation and differentiation using long term live cell imaging in microwell arrays. *Lab Chip* 12(23):5007–5015.
17. Polonsky M, Chain B, Friedman N (2016) Clonal expansion under the microscope: studying lymphocyte activation and differentiation using live-cell imaging. *Immunol Cell Biol* 94(3):242–249.
18. Marchingo JM, et al. (2016) T-cell stimuli independently sum to regulate an inherited clonal division fate. *Nat Commun* 7:13540.
19. Skylaki S, Hilsenbeck O, Schroeder T (2016) Challenges in long-term imaging and quantification of single-cell dynamics. *Nat Biotechnol* 34(11):1137–1144.
20. Harris T (1963) *The Theory of Branching Processes*. Springer, Berlin.
21. Wilkinson D.J. Stochastic modelling for quantitative description of heterogeneous biological systems. *Nat. Rev. Genet.* 2009; 10: 122-133
22. Wilkinson D.J. *Stochastic Modelling for Systems Biology*. Second Edition. CRC Press, 2011
23. Schroeder T (2011) Long-term single-cell imaging of mammalian stem cells. *Nat Methods* 8(4 Suppl):S30–5.
24. Moreau HD, et al. (2012) Dynamic in situ cytometry uncovers T cell receptor signaling during immunological synapses and kinapses in vivo. *Immunity* 37(2):351–363.

25. Stemberger C, et al. (2007) A single naive CD8+ T cell precursor can develop into diverse effector and memory subsets. *Immunity* 27(6):985–997.
26. Marchingo JM, et al. (2014) T cell signaling. Antigen affinity, costimulation, and cytokine inputs sum linearly to amplify T cell expansion. *346(6213):1123–1127*.
27. Heinzel S, et al. (2017) A Myc-dependent division timer complements a cell-death timer to regulate T cell and B cell responses. *Nat Immunol* 18(1):96–103.
28. Arsenio J, et al. (2014) Early specification of CD8+ T lymphocyte fates during adaptive immunity revealed by single-cell gene-expression analyses. *Nature Publishing Group* 15(4):365–372.
29. Kakaradov B, et al. (2017) Early transcriptional and epigenetic regulation of CD8+ T cell differentiation revealed by single-cell RNA sequencing. *Nature Publishing Group* 18(4):422–432.
30. Chang JT, et al. (2007) Asymmetric T lymphocyte division in the initiation of adaptive immune responses. *315(5819):1687–1691*.
31. Bird JJ, et al. (1998) Helper T cell differentiation is controlled by the cell cycle. *Immunity* 9(2):229–237.
32. Gett AV, Hodgkin PD (1998) Cell division regulates the T cell cytokine repertoire, revealing a mechanism underlying immune class regulation. *Proc Natl Acad Sci USA* 95(16):9488–9493.
33. Duffy, K. & Wellard, C. & Markham, J.F. Activation-induced B cell fates are selected by intracellular stochastic competition. *Science* 279, 338–341 (2012).
34. Marr, C., Strasser, M. K., Schwarzfischer, M., Schroeder, T. & Theis, F. J. Multi-scale modeling of GMP differentiation based on single-cell genealogies. *FEBS. J.* 279, 3488–3500 (2012).
35. Niederberger, T. et al. Factor graph analysis of live cell imaging data reveals mechanisms of cell fate decisions. *Bioinformatics* 31, 1816–1823 (2015).
36. Hormoz, S. et al. Inferring cell-state transition dynamics from lineage trees and endpoint single-cell measurements. *Cell Syst.* 3, 419–433 (2016). e8.
37. Feigelman J, Ganscha S, Hastreiter S, Schwarzfischer M, Filipczyk A, Schroeder T, Theis FJ, Marr C, Claassen M. Analysis of Cell Lineage Trees by Exact Bayesian Inference Identifies Negative Autoregulation of Nanog in Mouse Embryonic Stem Cells. *Cell Syst.* 2016 Nov 23;3(5):480-490.e13.
38. Strasser, M.K., Hoppe, P.S., Loeffler, D. et al. Lineage marker synchrony in hematopoietic genealogies refutes the PU.1/GATA1 toggle switch paradigm. *Nat Commun* 9, 2697 (2018).

## Material and Methods

### Mice

C57BL/6 wt mice were purchased from Envigo. OT-I Rag1<sup>-/-</sup> matrix donor mice expressing combinations of the congenic markers CD45.1/2 and CD90.1/2 were bred under specific pathogen-free conditions at the mouse facility of the Institute for Medical Microbiology, Immunology and Hygiene, Technical University of Munich (TUM), Munich 81675, Germany. Animal care and procedures were in accordance with institutional protocols as approved by the relevant local authorities.

### Cell Sorting



Cells were isolated from peripheral blood or spleens of C57BL/6 or OT-I Rag1<sup>-/-</sup> matrix donor mice and sorted for a naive phenotype (CD8<sup>+</sup>, CD44<sup>low</sup>) at a MoFlo Legacy or MoFLo XDP cell sorter. For experiments with sustained anti-CD3/CD28 stimulation a single naive CD8<sup>+</sup> T cell was sorted per well of an anti-CD3/CD28 coated (10 µg/mL at 4°C over night) plate (384 Well Small Volume™ LoBase med. binding µClear® microplate) containing 25 µL RPMI + Pen/Strep + 10 % heat-inactivated FCS and 25 U/mL recombinant human IL-2. For experiments with limited anti-CD3/CD28 stimulation 10 000 naive CD8<sup>+</sup>, CD44<sup>low</sup> T cells were sorted per well of an anti-CD3/CD28 coated (10 µg/mL at 4°C over night) plate (384 Well med. binding µClear® microplate) containing 100 µL RPMI + Pen/Strep + 10 % heat-inactivated FCS + 25 U/mL recombinant human IL-2 + 10 ng/mL murine IL-12. After 24 h at 37°C + 5% CO<sub>2</sub> + 95% H<sub>2</sub>O the cells were pooled and sorted again. This time it was sorted for activated (CD8<sup>+</sup>, CD44<sup>high</sup>) T cells and a single activated cell was sorted per well of an anti-CD28 coated 384 well plate (384 Well Small Volume™ LoBase med. binding µClear® microplate) containing 25 µL RPMI + Pen/Strep + 10 % heat-inactivated FCS and 25 U/mL recombinant human IL-2 with or without 10 ng/mL murine IL-12.

### **Continuous Single-Cell Imaging**

Live-cell imaging was performed by the ETH Zurich as described by Eilken et al. (Eilken, H.M., S. Nishikawa, and T. Schroeder, Continuous single-cell imaging of blood generation from haemogenic endothelium. *Nature*, 2009. 457(7231): p. 896-900.) Briefly, the microplates were transferred to a live-cell imaging microscope and approximately every 1-3 minutes a picture was taken from each well. For experiments in which the expression of a surface antigen was measured, the respective dye-conjugated antibody was added in very low concentration to the culture medium (e.g., 1:20 000 for anti-CD25-APC, corresponding to 10 ng/mL) and in addition to the bright field images the respective fluorescent channel was acquired approximately once every 45 minutes. The cells were observed for 3-5 days.

### **Cell Tracking**

Generation of T cell family trees and heat trees was performed by manually tracking the cells using “The Tracking Tool“ and the semi-automatic FI-measurement software “qTFy“ (Hilsenbeck, O., et al., Software tools for single-cell tracking and quantification of cellular and molecular properties. *Nat Biotechnol*, 2016. 34(7): p. 703-6.)

### **Cell Proliferation Dye Staining and Flow Cytometry**

Cell Proliferation Dye staining was performed using the CellTrace Violet™ Cell Proliferation Kit by ThermoFisher scientific according to the manufacturer’s instructions. Cells were sorted, activated for 24 h and sorted again as described in the section about cell sorting. After three days the cells were stained with anti-CD62L-FITC (MEL-14) and acquired using a Cytoflex S cytometer.

### **ELISA (Suppl.)**

The IL-2 ELISA was performed using the IL-2 Human ELISA Kit by ThermoFisher scientific according to the manufacturer’s instructions.

### **Antibodies and Cytokines**

Anti-murine CD3 (145-2C11), anti-murine CD28 (37.51) and anti-murine CD25-APC (PC61) were purchased from BD Bioscience, anti-murine CD8 (53.6.7), anti-murine CD44 (IM7) and anti-murine CD62L-FITC (MEL-14) were purchased from Biolegend. Recombinant murine IL-12 was purchased from Peprotech. Recombinant human IL-2 was purchased from ThermoFisher Scientific.

### **Statistical Analysis**

All non-in silico experiments were analyzed using Prism 7, 8 and 9 (GraphPad Software). p-values were assessed using a two-tailed unpaired Student’s t test, one-way ANOVA, Spearman non-parametric or Pearson test, as specified in the figure legends.

## Figures

Fig. 1

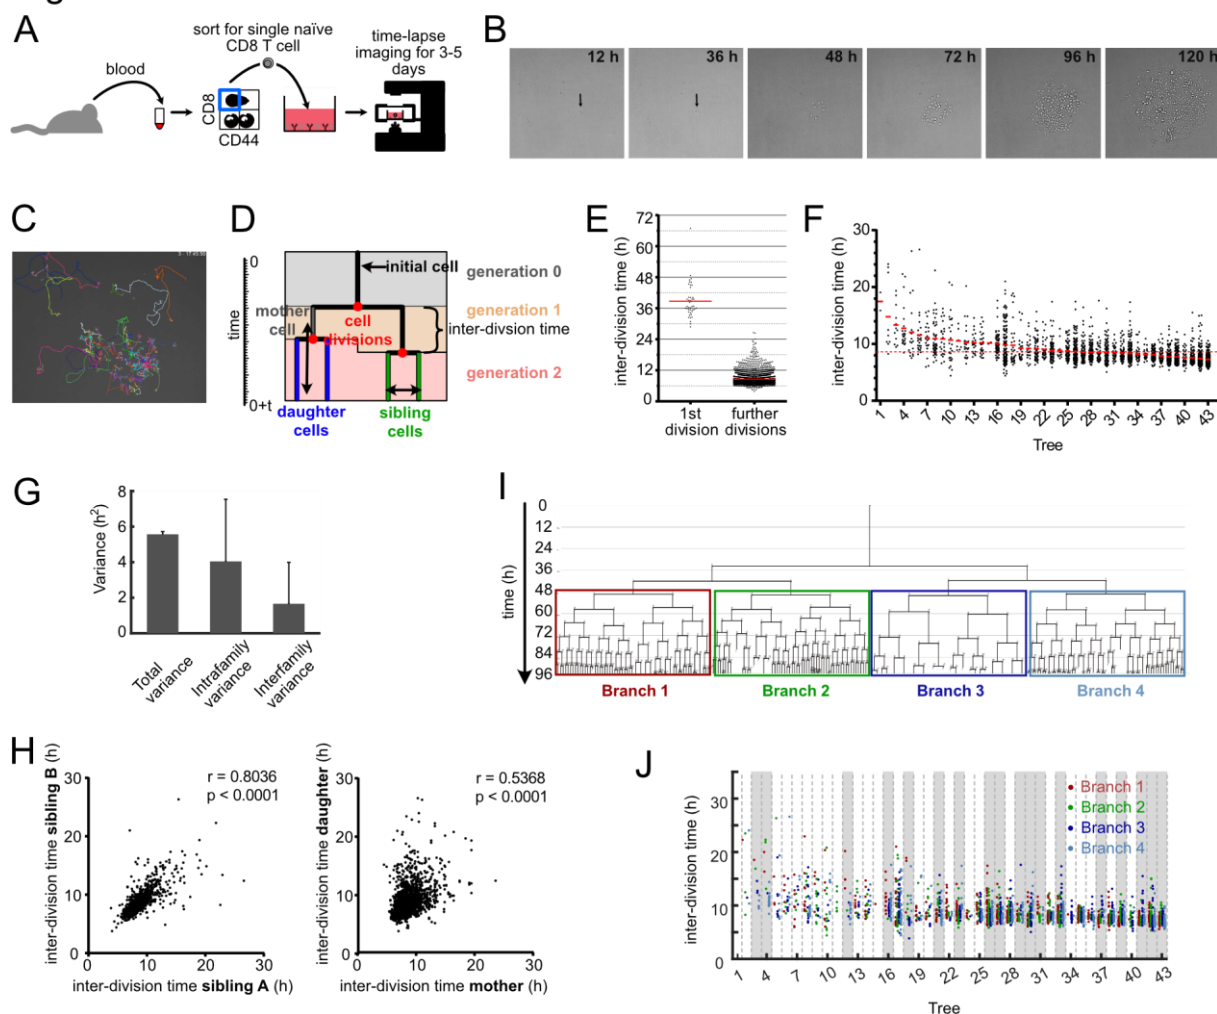

**Figure 1:**

**Continuous *in vitro* imaging reveals that distinct cell cycle speeds emerge within the same T cell family.** (A) Blood was taken from an OT-I mouse and sorted for naïve CD8<sup>+</sup>, CD44<sup>low</sup> cells. A single naïve OT-I cell was sorted into a well that was coated with  $\alpha$ CD3 and  $\alpha$ CD28 in the presence of 25 U/mL IL-2. The cell culture plate was transferred to a live-cell imaging microscope and imaged for the next three to five days. (B) Pictures, taken at different time points from the same single cell-derived progeny. (C) Snapshot of a single cell-derived progeny at 3 days, 17 hours and 45 minutes after start of acquisition. Colored lines represent migration pattern of individual cells. (D) Definitions of family tree associated data: y-axis: Time. Generation: The number of cell divisions that have occurred from the naïve T cell until the respective cell was created by division of its respective mother cell. Mother and daughter cells: The two cells that originate from the same cell division are daughter cells in respect of the original cell that divided (mother cell). Sibling cells: Cells that have the same mother cell. Inter-division time: Time between the creation of an individual cell due to the division of its mother cell into two daughter cells and the end of the respective cell due to its own division into two new daughter cells. (E) Time for first and subsequent divisions. Single naïve (CD44<sup>low</sup>) CD8<sup>+</sup> T cells were sorted into separate wells of an  $\alpha$ CD3/CD28-coated 384-well plate and imaged for 5 days in a live-cell imaging microscope. The fate of each cell was tracked and the inter-division time for the first division and all subsequent divisions were determined for 43 single-cell derived progenies (in total 43 cells for 1<sup>st</sup> division and 2710 cells for subsequent cell divisions). Red lines indicate the means. (F) Intra- and inter-clonal variability

of inter-division times. The inter-division times from (E) (first division excluded) arranged according to their mean inter-division time. Red bars: mean inter-division time within family tree. Red dotted line: mean for all cells. (G) Total variance of inter-division times from further divisions in (E), as well as the contribution of intrafamily and interfamily variances are shown. Intrafamily variance is calculated as the weighted mean of the variances of inter-division times within all different families. Interfamily variance is calculated as the weighted variance of the mean inter-division times of different families (Supplementary Methods). (H) Inter-division times from (E) were plotted against the inter-division times of their sibling cell (left panel, 1201 pairs) or their direct daughter cells (right panel, 2630 pairs). The correlation coefficient  $r$  and the p-value for spearman correlation are indicated. (I) A representative family tree was divided into 4 branches starting from generation 2. Loose ends: no further tracking possible for the respective cell. (J) Inter-division time of cells in the four branches starting from the second generation—as depicted in (I)—are color-coded for all trees in (F). In 18 out of 43 trees (~42%, highlighted trees), inter-division times differed significantly between the four branches.

Fig. 2

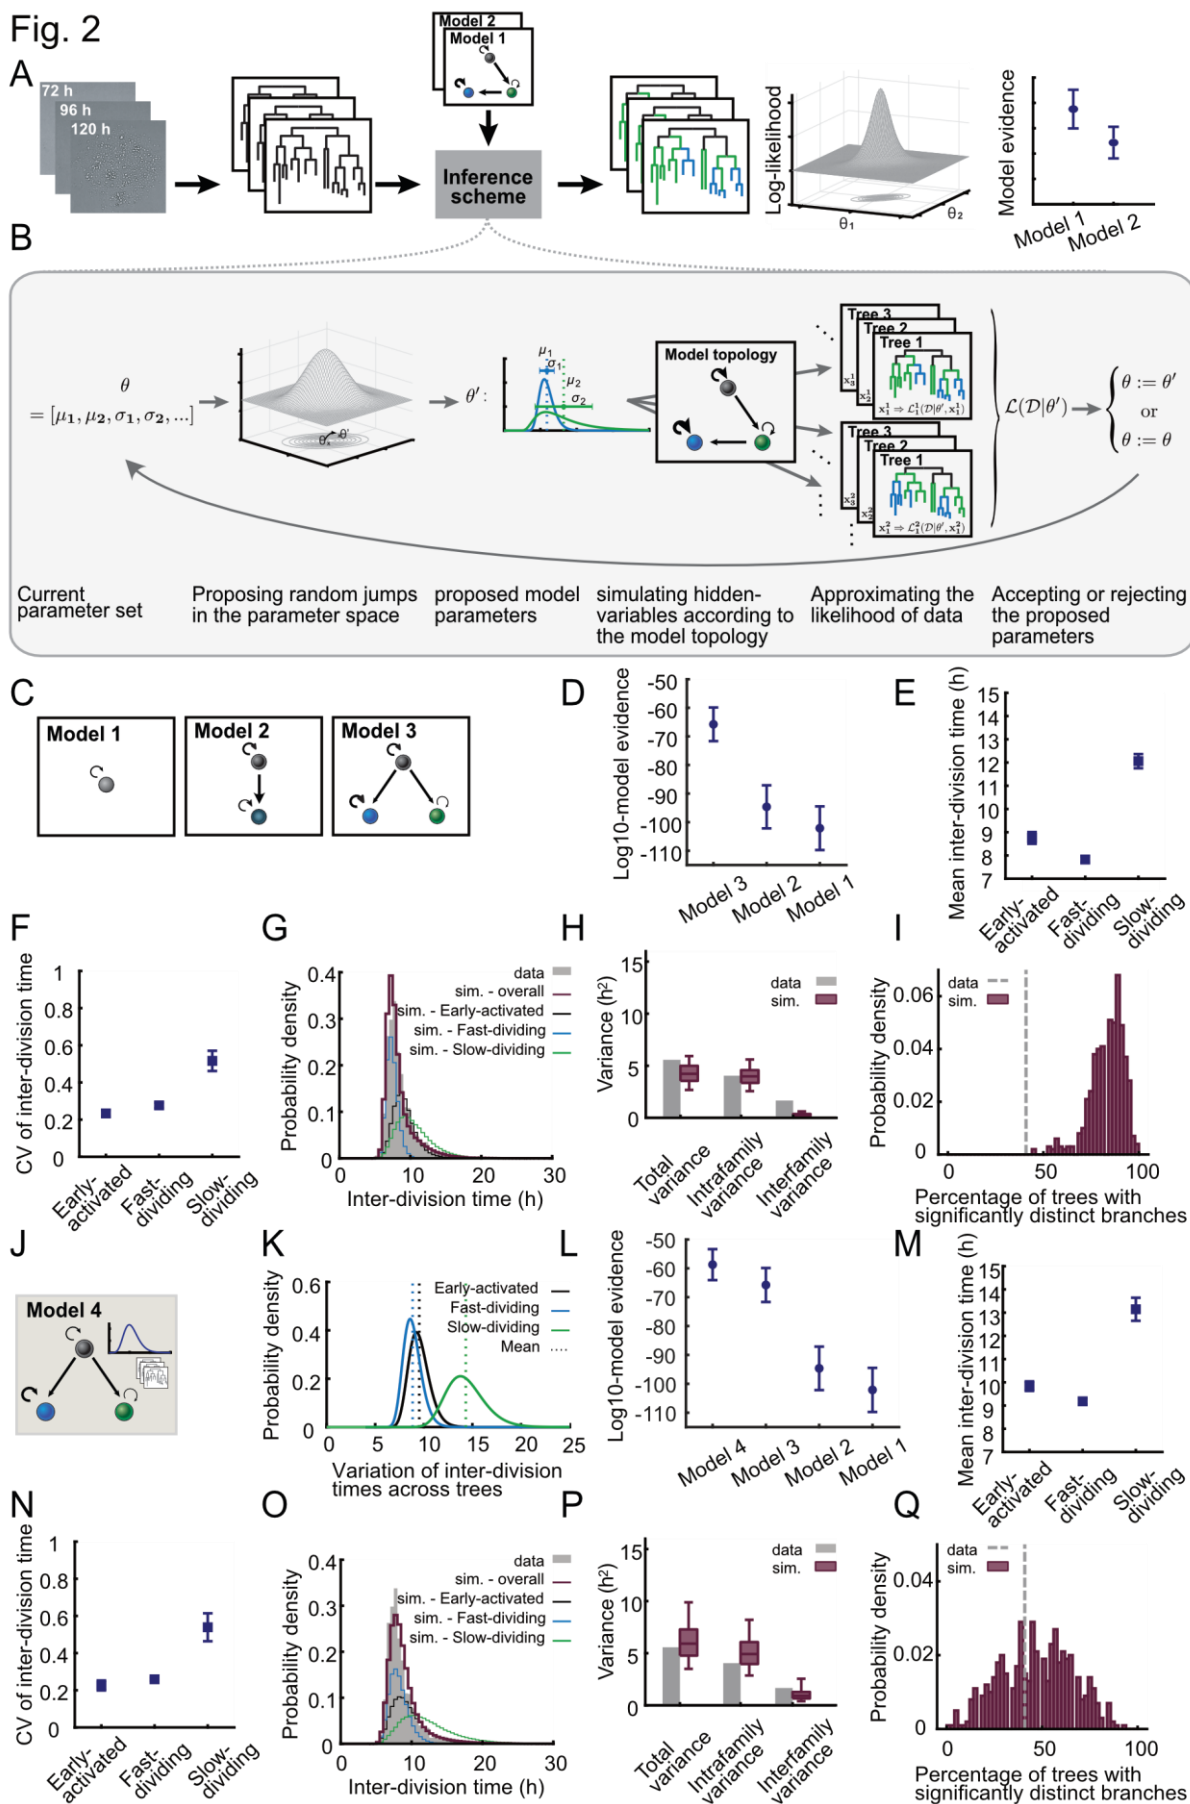

## Figure 2:

**Computational analysis of T cell family trees identifies a model in which early activated T cells diverge into slow and fast cycling subsets.** (A) Schematic of the workflow of our inference scheme. The scheme requires as input 1) lineage trees obtained from successive 2D microscopy images, and 2) one or more model hypotheses describing the underlying branching process. For every model hypothesis, it returns posterior distribution of model parameters and an approximation of the model evidence. The model evidences are used for model selection. (B) Individual steps of the iterative inference scheme. In every iteration, a new set of model parameters are proposed based on the current parameter values and a proposal distribution. These proposed parameters, e.g., the mean and CV of subset-specific inter-division time distribution, are used to simulate several samples of hidden variables of the model. For instance, the shown model topology includes three different subsets (black, blue and green). The simulated hidden variables in this case are the subset that is assigned to each cell in the tree. For every tree and every simulated sample, the likelihood of the data is calculated given the current value of parameters and hidden variables. A Monte Carlo approximation method is used to calculate the overall likelihood of the data given the parameters. The proposed parameter set is accepted with the acceptance probability calculated based on the likelihood, and is rejected otherwise. (C) Schematic of different model hypotheses used for the analysis of T cell family trees: Model #1 assumes a homogenous population with one proliferation speed. Model #2 assumes an early expanding subset that later differentiates into another subset with a distinct proliferation speed. Model #3 assumes an early expanding subset that diversifies into slow- and fast-dividing subsets. (D) The model evidences for the models in (C) indicate the following hierarchy where model #3 explains the data best and model #1 is least matching to the data: model #3 > model #2 > model #1. The circles show the mean of model evidences of the eight data groups (Supplementary Methods). The error bars show the standard error of the mean. (E) Inferred mean and (F) CV of the inter-division time distribution for “Early-activated”, “Slow-dividing” and “Fast-dividing” subsets based on model #3. For every data group, the median of the posterior distribution of the respective parameters is calculated; the squares denote the mean of these medians (Supplementary Methods). The error bars show the standard error of the mean. (G) The distribution of inter-division times in 10000 simulated trees based on model #3 compared to that of the experimental data (grey). The red histogram shows the overall distribution in the simulated data, while the black, blue and green histograms show the distribution of “Early-activated”, “Fast-dividing” and “Slow-dividing” subsets respectively. The results are shown for one data group. (H) Total variance of the inter-division times and the contribution of intrafamily and interfamily sources as observed in the experimental data (grey bars) and simulated data (red boxes). The simulated data consists of 500 datasets of each 44 trees simulated based on model #3. Intrafamily variance is calculated as the weighted mean of the variances of inter-division times within different families. Interfamily variance is calculated as the weighted variance of the family mean inter-division times (Supplementary Methods). The results are shown for one data group. (I) Percentage of the trees whose four branches (as in Fig. 1I) have significantly distinct inter-division times. The grey line shows the experimental data and the red histogram shows the distribution of this percentage in the simulated data as in (H) (Supplementary Methods). The results are shown for one data group. (J) Model #4 adopts the topology of model #3 and incorporates interfamily variability in addition. The subset-specific mean inter-division times are assumed to be log-normally distributed with unknown parameters among different families (Supplementary Methods). (K) Inferred variation of subset-specific mean inter-division times among different families based on model #4. The black, blue and green curves show the distribution for “Early-activated”, “Fast-dividing” and “Slow-dividing” subsets respectively. The results are shown for one data group. (L) Model evidences for the models in (C) and (J) indicate that model #4 explains the data best. The circles show the mean of model evidences of eight data groups (Supplementary Methods). The error bars show the standard error of the mean. (M) and (N) Same as (E) and (F) with parameters inferred based on model #4. (O), (P) and (Q) Same as (G), (H) and (I) with simulated data based on model #4.

Fig. 3

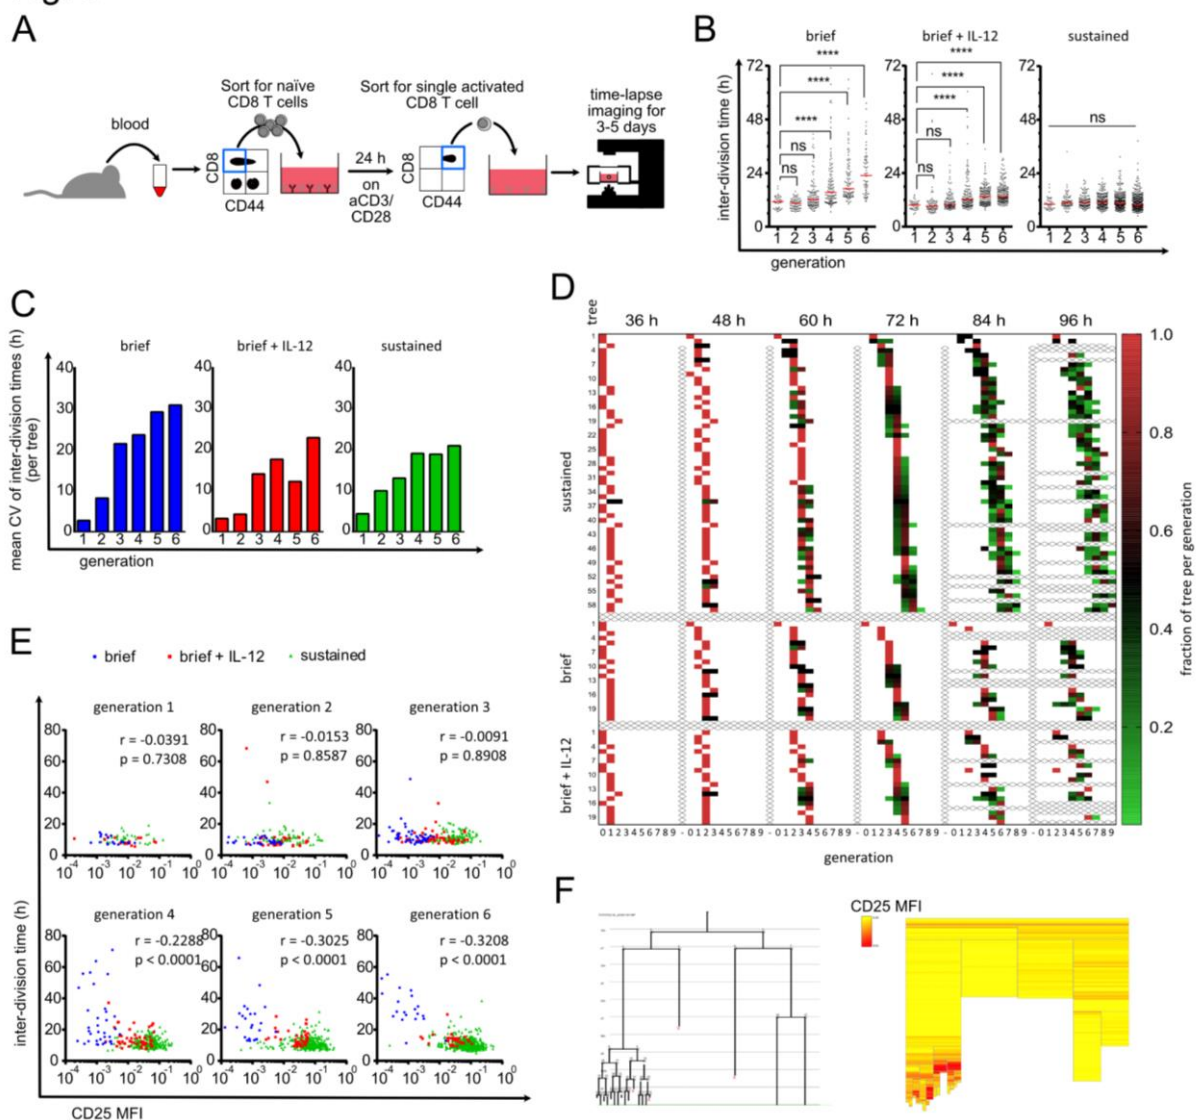

Figure 3:

**Diversification of division speed occurs after a homogenous burst phase and is preceded by differences in CD25 expression.** (A) Live-cell imaging with brief TCR stimulation. Blood was taken from an OT-I mouse and sorted for naïve CD8 T cells. 10 000 cells/well were activated for 24 h with plate-bound  $\alpha$ CD3/CD28 and 25 U/mL IL-2. Cells were sorted again for activated (CD44<sup>high</sup>) cells and a single cell was sorted in each well of a 384-well plate that was coated with ICAM-1 or  $\alpha$ CD28 to enable attachment. The cells were imaged for 3-5 days. (B) Cells were stimulated as described in (A). After the brief stimulation and segregation 10 ng/mL IL-12 were added to the medium (second panel) or not (left panel). The cells in the right-hand panel were stimulated continuously with  $\alpha$ CD3/ $\alpha$ CD28 as in figure 1. The inter-division times of all cells are plotted for the respective generations. Red lines indicate the median. Kruskal-Wallis test: \*\*\*\*:  $p < 0.0001$  (C) Data points from (B) were allocated to the different family trees, and the coefficients of variation of the inter-division times within the trees were calculated within each generation. The mean of these CVs is plotted as bar graph. On average 15.45 trees per bar (4-27). (D) For all three conditions it is shown how the individual cells within a tree are distributed over the generations at different time points. The fraction of tree per generation is calculated by dividing the number of cells in a specific generation at the given time point by the maximum number of cells potentially present in the respective generation (number of cells in generation X /  $2^{\text{generation X}}$ ). E.g., for a potential tree that consists after 48 h out of 1 cell in generation 2 and 6 cells in generation 3 the respective fractions of tree per generation are for generation 2:  $1 / 2^2 = 0.25$  and for

generation 3:  $6 / 2^3 = 0.75$ . For incompletely tracked trees (e.g., when cells died or the identity of cells is unclear) the fractions of tree per generation is corrected so that the sum of all fractions of tree per generation sum up to 1.0 (corrected fraction of tree per generation = fraction of tree per generation / sum of all fractions of tree per generation at the same time point). Each square represents the cells of a tree that are in the respective generation at the given time point. The redder the box is, the higher is the fraction of the tree in the respective generation. Thus, red boxes indicate synchronized cell divisions whereas green boxes indicate desynchronization. Samples from the continuous stimulation setting are depicted in the upper part. Below that are the short stimulation samples. The short stimulation + IL-12 samples are depicted in the bottom part. **(E)** As in (A) but  $\alpha$ CD25-APC was added to the culture. The inter-division times of all cells from all investigated trees were separated according to their generation, and their inter-division times were plotted against their CD25 expression. Blue: brief stimulation without IL-12. Red: brief stimulation with IL-12. Green: continuous stimulation. Spearman r and p-values as indicated. Results from: Generation 1: 80 cells, generation 2: 138 cells, generation 3: 232 cells, generation 4: 313 cells, generation 5: 422 cells, generation 6: 583 cells. **(F)** Exemplary tree (brief stimulation + IL-12) shown as family tree (left panel. Loose ends with red X: cell died) and heat tree (right panel). Each box represents a cell as in the family tree. Yellow: low CD25 expression. Red: high CD25 expression. Blank: no CD25 quantification possible.

Fig. 4

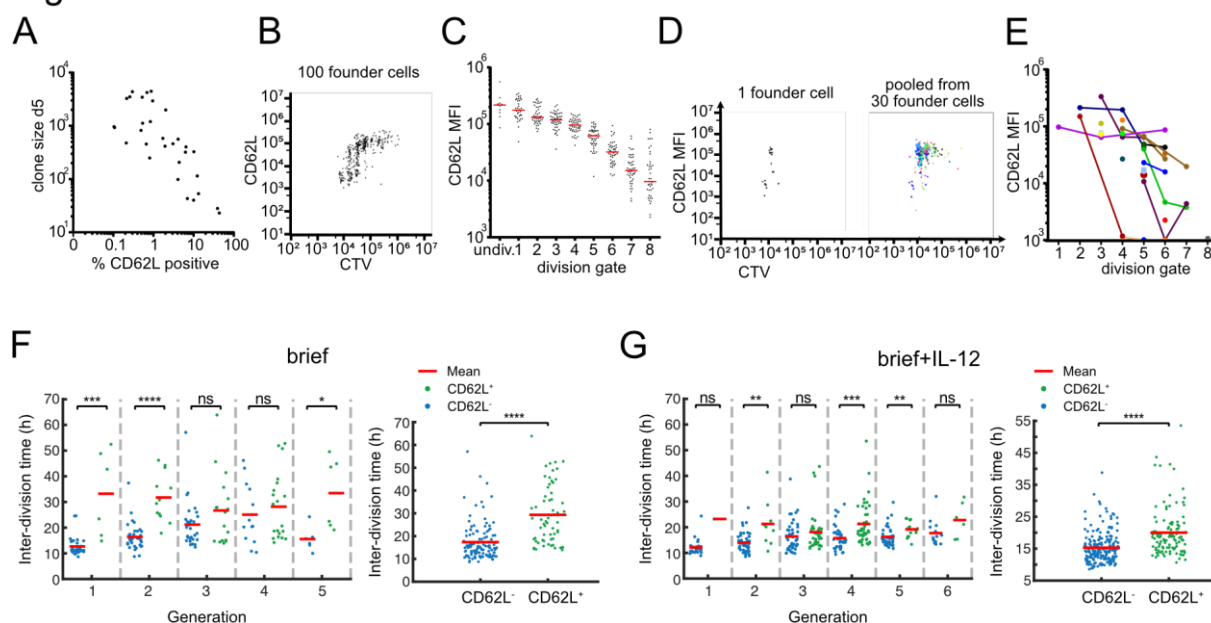

**Figure 4:**

**Adoption of slower division speed coincides with re-expression of CMP marker CD62L.** (A) Cell numbers of single cell-derived progenies are plotted against the percentage of CD62L expressing cells (determined by flow cytometry) within the respective T-cell family (continuous TCR stimulation). Spearman correlation coefficient  $r = -0.7569$ ,  $p < 0.0001$   $n = 31$  (cells with %CD62L = 0% excluded from analysis). (B) Representative Cell Trace Violet plot of the offspring of 100 OT-I cells that had been stained with Cell Trace Violet and activated for 24 h. After further 3 days of cell culture, the cells were stained for CD62L and analyzed by flow cytometry. (C) On the basis of the vertical lines in the Cell Trace Violet plot in (B), the number of cell divisions for each cell in the plot can be estimated. The mean CD62L expression within each division peak is shown for all cells of the 100 cell-derived progenies. (D) Left panel: Representative Cell Trace Violet plot as in (B) but from a single progenitor cell. Right panel: Overlay of 30 single-cell Cell Trace Violet plots. Each color represents a different single-cell derived progeny. (E) CD62L expression in division peaks as in (C) but from single-cell derived progenies. In addition, division peaks of the same single-cell tree are drawn in the same color and connected with a line. (F) Inter-division times in different generations (left) and from all generations together (right) in the “brief” stimulation condition. The two-sided Wilcoxon rank sum test is used to determine if the inter-division times of CD62L<sup>+</sup> (green) and CD62L<sup>-</sup> (blue) cells are significantly different: ns: p-value > 0.05, \*: p-value ≤ 0.05, \*\*: p-value ≤ 0.01, \*\*\*: p-value ≤ 0.001, \*\*\*\*: p-value ≤ 0.0001. (G) Same as (F) for the “brief+IL-12” stimulation condition.
